# Supplementary material
Source: HighWire-hosted journal article supplement (https://www.annfammed.org/highwire/filestream/15251/field_highwire_adjunct_files/0/Khanna_supp.pdf)
Supplement: Khanna_supp.pdf [file Khanna_supp.pdf]

## Supplemental materials for

Dark M, Klyushnenkova E, Gaynor A, Kernan C, Khanna N. Tobacco cessation champions: recognizing physicians who ask, advise, and refer. *Ann Fam Med*. 2022;20(6).

---

### References

1. Centers for Disease Control and Prevention. Fast facts and fact sheets. Published 2018. Accessed Jul 28, 2022. [https://www.cdc.gov/tobacco/data\\_statistics/fact\\_sheets](https://www.cdc.gov/tobacco/data_statistics/fact_sheets)
2. Khanna N, Klyushnenkova E, Rao V, Siegel N, Wolfe S. Electronic referrals to the tobacco quitline: implementation strategies in a large health system to optimize delivery of tobacco cessation to patients. *Transl Behav Med*. 2021;11(5):1107-1114. [10.1093/tbm/ibaa094](https://doi.org/10.1093/tbm/ibaa094)
3. Khanna N, Klyushnenkova E, Quinn D, Wolfe S. Patient engagement by the tobacco quitline after electronic referrals [published online ahead of print Aug 5, 2022]. *Nicotine Tob Res*. 2022;ntac190. [10.1093/ntr/ntac190](https://doi.org/10.1093/ntr/ntac190)
4. Cancer Center Cessation Initiative Sustainability Working Group. Sustainability of tobacco treatment programs in the Cancer Center Cessation Initiative. *J Natl Compr Canc Netw*. 2021;19(Suppl\_1):S16-S20. 10.6004/jnccn.2021.7093
5. Cancer Center Cessation Initiative Diversity, Equity, and Inclusion Working Group Members. Integrating diversity, equity, and inclusion approaches into treatment of commercial tobacco use for optimal cancer care delivery. *J Natl Compr Canc Netw*. 2021;19(Suppl\_1):S4-S7. 10.6004/jnccn.2021.7091
